# Supplementary material for: Macroscopic handedness inversion of terbium coordination polymers achieved by doping homochiral ligand analogues
Source: Royal Society of Chemistry journal article supplement (doi:10.1039/d3sc03230b), 2023-01-01
Supplement: d3sc03230b1.pdf [file d3sc03230b1.pdf]

## Supporting Information

### **Macroscopic handedness inversion of terbium coordination polymers achieved by doping homochiral ligand analogues**

Chang-Yu Wang, Jia-Ge Jia, Guo-Guo Weng, Ming-Feng Qin, Kui Xu and Li-Min Zheng

State Key Laboratory of Coordination Chemistry, School of Chemistry and Chemical Engineering, Collaborative Innovation Centre of Advanced Microstructures, Nanjing University, Nanjing 210023, P. R. China. \*Corresponding author. E-mail: lmzheng@nju.edu.cn

# Experimental procedures

## General materials and measurements

All starting materials were used as purchased from commercial sources without further purification. (*R*)- or (*S*)-(1-cyclohexyl-ethylamino)methylphosphonic acid (*R*- or *S*-cyampH<sub>2</sub>),<sup>1</sup> (*R*)- or (*S*)-(1-phenylethylamino)methylphosphonic acid (*R*- or *S*-pempH<sub>2</sub>),<sup>2</sup> and (*R*)-(4-*X*-phenylethylamino)methylphosphonic acid (*R*-*X*pempH<sub>2</sub>, *X* = F, Cl, Br) were synthesized according to a literature method<sup>3</sup> with (*R*)- or (*S*)-cyclohexylethyl-1-amine, (*R*)- or (*S*)-phenylethyl-1-amine and (*R*)-4-*X*-phenylethyl-1-amine as the reactant respectively as well as paraformaldehyde and diethyl phosphite. The pH value was measured by using a Sartorius PB-10 pH metre. Powder X-ray diffraction (PXRD) data were collected on Bruker D8 advance diffractometer with Cu-K $\alpha$  radiation in a range of 4–50°. The infrared spectra were recorded by using Bruker Tensor 27 spectrometer in a 4000–400 cm<sup>-1</sup> region with pressed KBr pellets of the analytes. Scanning electron microscope (SEM) imaging and energy dispersive X-ray (EDX) analysis were carried out on Hitachi S-4800. Fluorescence spectra were obtained by using an Edinburgh FLS980 spectrofluorometer and the circularly polarized luminescence (CPL) spectra by using a JASCO CPL-300 CPL spectrophotometer. The ECD spectra were measured on a JASCO J-810 spectropolarimeter and the VCD spectra on a Bruker VERTEX 80V FT-IR spectrometer using KBr pellets at room temperature. The elemental analysis was done by using an Elementar Vario MICRO cube elemental analyzer. The thermogravimetric analysis (TGA) was performed on a Mettler-Toledo TGA/DSC STARe thermal analyzer under a nitrogen gas flow at a heating rate of 5 °C/min in the range of 25–600 °C.

## Synthetic procedures

***R*- and *S*-Tb(cyamp)<sub>3a</sub>(pemp)<sub>3(1-a)</sub>·3H<sub>2</sub>O** (the molar ratio  $a \approx x$  and the doping ratio  $x = 5\%$ ,  $10\%$  or  $20\%$ ) (***R*- and *S*-1H-*x***). The compound ***R*- and *S*-1H-*x*** was prepared through the similar procedures except the molar ratio of the ligands according to the value of  $x$ . A typical procedure for the synthesis of ***R*-1H-5%** is described below. *R*-cyampH<sub>2</sub> (0.285 mmol, 63.1 mg), *R*-pempH<sub>2</sub> (0.015 mmol, 3.2 mg) and Tb(OAc)<sub>3</sub>·3H<sub>2</sub>O (0.1 mmol, 39.0 mg) were added in 8.5 mL deionized water and stirred for 5 h until the solution turned white and opaque. Afterwards, 0.5 M NaOH solution was used to adjust pH of the suspension to 5.0. Then the suspension was kept in a Teflon-lined autoclave at 100 °C for 1 d. After being cooled to room temperature, the precipitates of ***R*-1H-5%** were collected by centrifugation and washed three times with water and then dried in air. Yield: 73.0% based on Tb. Elemental analysis (%) calcd for C<sub>27</sub>H<sub>61.8</sub>N<sub>3</sub>O<sub>11</sub>P<sub>3</sub>Tb: C 37.17, H 7.14, and N 4.82; found: C 36.84, H 6.90, and N 4.64. IR (KBr, cm<sup>-1</sup>): 3680(w), 3420(w),

2986(w), 2928(s), 2853(m), 2793(w), 2670(w), 2523(w), 2405(w), 1618(m), 1450(m), 1392(w), 1344(w), 1308(w), 1275(w), 1234(w), 1153(s), 1072(s), 1024(s), 989(s), 893(w), 860(w), 783(w), 763(m), 702(w), 613(w), 567(m), 517(w), 483(m), 457(w).

For **S-1H-5%**. Yield: 68.3% based on Tb. Elemental analysis (%) calcd for  $C_{27}H_{62.0}N_3O_{11}P_3Tb$ : C 37.16, H 7.16, and N 4.82; found: C 36.84, H 7.04, and N 4.71. IR (KBr,  $cm^{-1}$ ): 3733(w), 3680(w), 3420(w), 2986(w), 2928(s), 2853(m), 2793(w), 2670(w), 2523(w), 2405(w), 2351(w), 2323(w), 1618(m), 1450(m), 1392(w), 1344(w), 1308(w), 1275(w), 1234(w), 1153(s), 1072(s), 1024(s), 989(s), 893(w), 860(w), 783(w), 763(m), 702(w), 613(w), 567(m), 517(w), 483(m), 457(w).

For **R-1H-10%**. Yield: 69.7% based on Tb. Elemental analysis (%) calcd for  $C_{27}H_{60.7}N_3O_{11}P_3Tb$ : C 37.22, H 7.02, and N 4.82; found: C 36.71, H 6.78, and N 4.40. IR (KBr,  $cm^{-1}$ ): 3733(w), 3680(w), 3420(w), 2986(w), 2928(s), 2853(m), 2793(w), 2670(w), 2523(w), 2405(w), 2351(w), 2323(w), 1618(m), 1450(m), 1392(w), 1344(w), 1308(w), 1275(w), 1234(w), 1153(s), 1072(s), 1024(s), 989(s), 893(w), 860(w), 783(w), 763(m), 702(w), 613(w), 567(m), 517(w), 483(m), 457(w).

For **S-1H-10%**. Yield: 62.1% based on Tb. Elemental analysis (%) calcd for  $C_{27}H_{61.0}N_3O_{11}P_3Tb$ : C 37.21, H 7.06, and N 4.82; found: C 36.82, H 6.96, and N 4.68. IR (KBr,  $cm^{-1}$ ): 3733(w), 3680(w), 3420(w), 2986(w), 2928(s), 2853(m), 2793(w), 2670(w), 2523(w), 2405(w), 2351(w), 2323(w), 1618(m), 1450(m), 1392(w), 1344(w), 1308(w), 1275(w), 1234(w), 1153(s), 1072(s), 1024(s), 989(s), 893(w), 860(w), 783(w), 763(m), 702(w), 613(w), 567(m), 517(w), 483(m), 457(w).

For **R-1H-20%**. Yield: 68.1% based on Tb. Elemental analysis (%) calcd for  $C_{27}H_{59.4}N_3O_{11}P_3Tb$ : C 37.27, H 6.89, and N 4.83; found: C 37.27, H 6.58, and N 4.71. IR (KBr,  $cm^{-1}$ ): 3733(w), 3680(w), 3420(w), 2986(w), 2928(s), 2853(m), 2793(w), 2670(w), 2523(w), 2405(w), 2351(w), 2323(w), 1618(m), 1450(m), 1392(w), 1344(w), 1308(w), 1275(w), 1153(s), 1072(s), 1024(s), 989(s), 893(w), 860(w), 763(m), 702(w), 613(w), 567(m), 517(w), 477(m), 457(w).

For **S-1H-20%**. Yield: 68.3% based on Tb. Elemental analysis (%) calcd for  $C_{27}H_{59.3}N_3O_{11}P_3Tb$ : C 37.28, H 6.87, and N 4.83; found: C 36.98, H 6.73, and N 4.69. IR (KBr,  $cm^{-1}$ ): 3733(w), 3680(w), 3420(w), 2986(w), 2928(s), 2853(m), 2793(w), 2670(w), 2523(w), 2405(w), 2351(w), 2323(w), 1618(m), 1450(m), 1392(w), 1344(w), 1308(w), 1275(w), 1153(s), 1072(s), 1024(s), 989(s), 893(w), 860(w), 763(m), 702(w), 613(w), 567(m), 517(w), 477(m), 457(w).

**R-Tb(cyamp)<sub>3a</sub>(Fpemp)<sub>3(1-a)</sub>** (the molar ratio  $a \approx x$  and the doping ratio  $x = 5\%$  and  $10\%$ ) (**R-2F-x**). The compounds **R-2F-x** were prepared through the similar procedures to **R-1H-x** except that *R*-pempH<sub>2</sub> were replaced by *R*-FpempH<sub>2</sub>. For **R-2F-5%**. Yield: 65.1% based on Tb. Elemental analysis (%) calcd for  $C_{27}H_{62.1}N_3O_{12}P_3F_{0.13}Tb$ : C, 37.05; H, 7.15; N, 4.80; found: C, 36.73; H, 6.73; N, 4.64. IR (KBr,  $cm^{-1}$ ): 3732(w), 3674(w),

3425(w), 2984(w), 2928(s), 2855(m), 2793(w), 2669(w), 2519(w), 2401(w), 2353(w), 2324(w), 1618(m), 1514(w), 1450(m), 1391(w), 1344(w), 1308(w), 1275(w), 1229(w), 1153(s), 1074(s), 1022(s), 988(s), 891(w), 856(w), 841(w), 810(w), 781(w), 764(m), 730(w), 613(w), 565(m), 515(w), 484(m), 476(m), 457(w), 419(w).

For **R-2F-10%**. Yield: 61.6% based on Tb. Elemental analysis (%) calcd for  $C_{27}H_{61.0}N_3O_{12}P_3F_{0.29}Tb$ : C, 36.97; H, 7.01; N, 4.79; found: C, 36.89; H, 7.19; N, 4.68. IR (KBr,  $cm^{-1}$ ): 3732(w), 3674(w), 3425(w), 2984(w), 2928(s), 2855(m), 2793(w), 2669(w), 2519(w), 2401(w), 2353(w), 2324(w), 1618(m), 1514(w), 1450(m), 1391(w), 1344(w), 1308(w), 1275(w), 1229(w), 1153(s), 1074(s), 1022(s), 988(s), 891(w), 856(w), 841(w), 810(w), 781(w), 764(m), 730(w), 613(w), 565(m), 515(w), 484(m), 476(m), 457(w), 419(w).

**R-Tb(cyamp)<sub>3a</sub>(Clpemp)<sub>3(1-a)</sub>** (the molar ratio  $a \approx x$  and the doping ratio  $x=5\%$  and  $10\%$ ) (**R-3Cl-x**). The compounds **R-3Cl-x** were prepared through the similar procedures to **R-1H-x** except that *R*-pempH<sub>2</sub> were replaced by *R*-Cl-pempH<sub>2</sub>. For **R-3Cl-5%**. Yield: 62.2% based on Tb. Elemental analysis (%) calcd for  $C_{27}H_{62.1}N_3O_{12}P_3Cl_{0.13}Tb$ : C, 36.97; H, 7.14; N, 4.79; found: C, 36.60; H, 6.77; N, 4.55. IR (KBr,  $cm^{-1}$ ): 3732(w), 3674(w), 3424(w), 2984(w), 2928(s), 2853(m), 2791(w), 2669(w), 2517(w), 2399(w), 2353(w), 2324(w), 1618(m), 1450(m), 1391(w), 1346(w), 1308(w), 1275(w), 1234(w), 1153(s), 1072(s), 1022(s), 988(s), 891(w), 858(w), 781(w), 764(m), 615(w), 565(m), 517(w), 484(m), 476(m), 457(w), 419(w).

For **R-3Cl-10%**. Yield: 69.4% based on Tb. Elemental analysis (%) calcd for  $C_{27}H_{61.1}N_3O_{12}P_3Cl_{0.27}Tb$ : C, 36.80; H, 6.99; N, 4.77; found: C, 36.53; H, 7.19; N, 4.66. IR (KBr,  $cm^{-1}$ ): 3732(w), 3674(w), 3424(w), 2984(w), 2928(s), 2853(m), 2791(w), 2669(w), 2517(w), 2401(w), 2353(w), 2324(w), 1620(m), 1450(m), 1391(w), 1344(w), 1308(w), 1275(w), 1234(w), 1153(s), 1074(s), 1022(s), 988(s), 891(w), 858(w), 783(w), 764(m), 615(w), 565(m), 517(w), 484(m), 474(m), 457(w), 419(w).

**R-Tb(cyamp)<sub>3a</sub>(Brpemp)<sub>3(1-a)</sub>** (the molar ratio  $a \approx x$  and the doping ratio  $x=5\%$  and  $10\%$ ) (**R-4Br-x**). The compounds **R-4Br-x** were prepared through the similar procedures to **R-1H-x** except that *R*-pempH<sub>2</sub> were replaced by *R*-Br-pempH<sub>2</sub>. For **R-4Br-5%**. Yield: 53.7% based on Tb. Elemental analysis (%) calcd for  $C_{27}H_{62.2}N_3O_{12}P_3Br_{0.11}Tb$ : C, 36.60; H, 6.77; N, 4.55; found: C, 36.40; H, 6.73; N, 4.29. IR (KBr,  $cm^{-1}$ ): 3732(w), 3674(w), 3422(w), 2984(w), 2928(s), 2853(m), 2791(w), 2669(w), 2517(w), 2399(w), 2353(w), 2322(w), 1620(m), 1450(m), 1391(w), 1344(w), 1308(w), 1275(w), 1234(w), 1153(s), 1072(s), 1022(s), 988(s), 891(w), 858(w), 783(w), 764(m), 615(w), 565(m), 517(w), 484(m), 474(m), 457(w), 419(w).

For **R-4Br-10%**. Yield: 59.6% based on Tb. Elemental analysis (%) calcd for  $C_{27}H_{60.6}N_3O_{12}P_3Br_{0.36}Tb$ : C, 36.02; H, 6.77; N, 4.67; found: C, 35.61; H, 6.53; N, 4.25. IR (KBr,  $cm^{-1}$ ): 3732(w), 3674(w), 3420(w), 2984(w), 2928(s), 2853(m), 2793(w),

2669(w), 2519(w), 2399(w), 2351(w), 2324(w), 1620(m), 1450(m), 1391(w), 1346(w), 1308(w), 1277(w), 1232(w), 1153(s), 1074(s), 1022(s), 988(s), 891(w), 858(w), 818(w), 779(w), 762(m), 615(w), 565(m), 517(w), 484(m), 474(m), 457(w), 420(w).

## References

- 1 Z.-S. Cai, S.-S. Bao, M. Ren, L.-M. Zheng, *Chem. Eur. J.*, 2014, **20**, 17137-17142.
- 2 (a) X.-G. Liu, S. Bao, Y.-Z. Li and L.-M. Zheng, *Inorg. Chem.*, 2008, **47**, 5525; (b) J.-G. Jia, J.-S. Feng, X.-D. Huang, S.-S. Bao and L.-M. Zheng, *Chem. Commun.*, 2019, **55**, 2825-2828.
- 3 J.-G. Jia, C.-C. Zhao, S.-S. Bao, L.-Q. Wu, G.-H. Wen, A. J. Jacobson, J. Ma and L.-M. Zheng, *J. Am. Chem. Soc.*, 2021, **143**, 17587-17598.

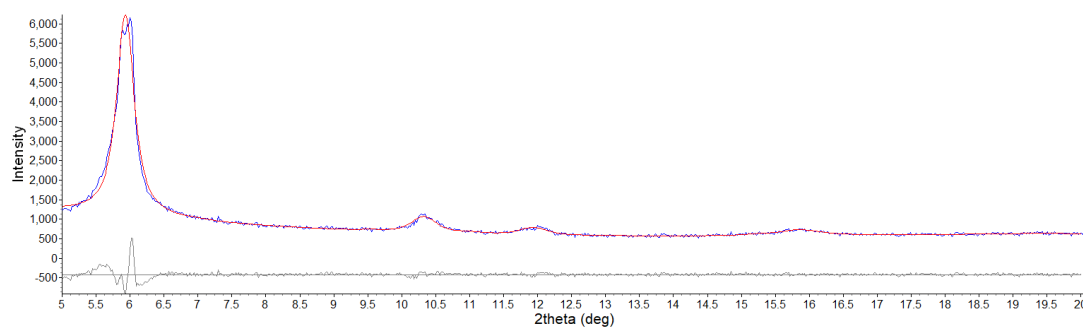

**Figure S1** Pawley fit of powder samples of **R-1H-5%** using Topas 5.0 program. Fitted cell parameters ( $R_{wp} = 5.30$ ):  $P6_5$ ,  $a = 17.01 \text{ \AA}$ ,  $c = 23.53 \text{ \AA}$ ,  $V = 5898.8 \text{ \AA}^3$ .

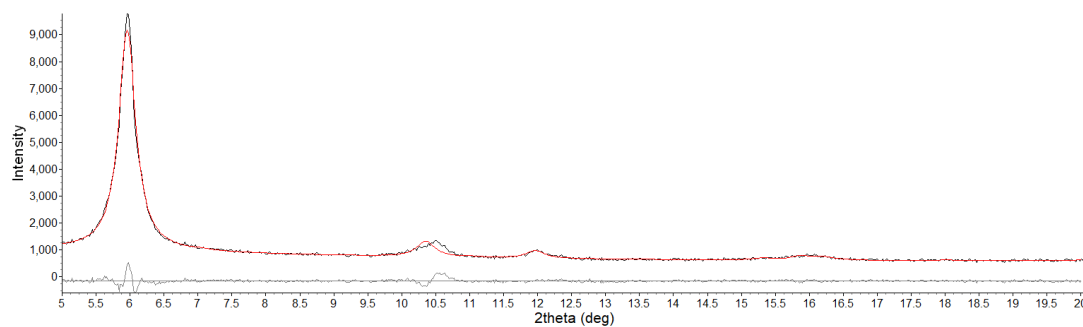

**Figure S2** Pawley fit of powder samples of **R-1H-10%** using Topas 5.0 program. Fitted cell parameters ( $R_{wp} = 5.16$ ):  $P6_5$ ,  $a = 17.01 \text{ \AA}$ ,  $c = 23.53 \text{ \AA}$ ,  $V = 5898.8 \text{ \AA}^3$ .

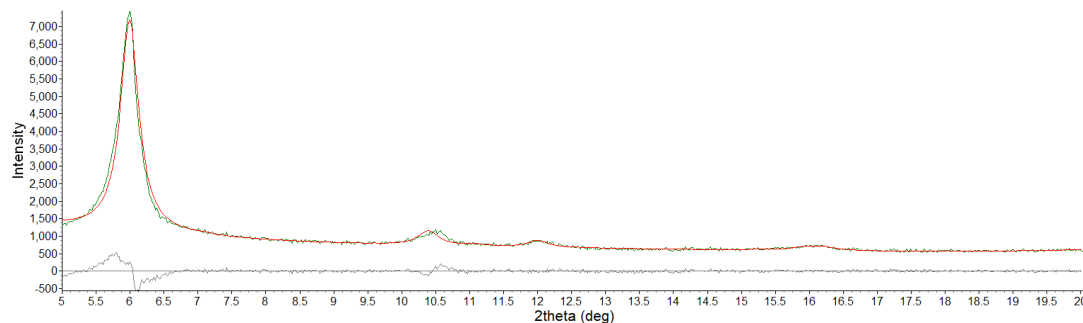

**Figure S3** Pawley fit of powder samples of **R-1H-20%** using Topas 5.0 program. Fitted cell parameters ( $R_{wp} = 5.96$ ):  $P6_5$ ,  $a = 17.01 \text{ \AA}$ ,  $c = 23.53 \text{ \AA}$ ,  $V = 5898.8 \text{ \AA}^3$ .

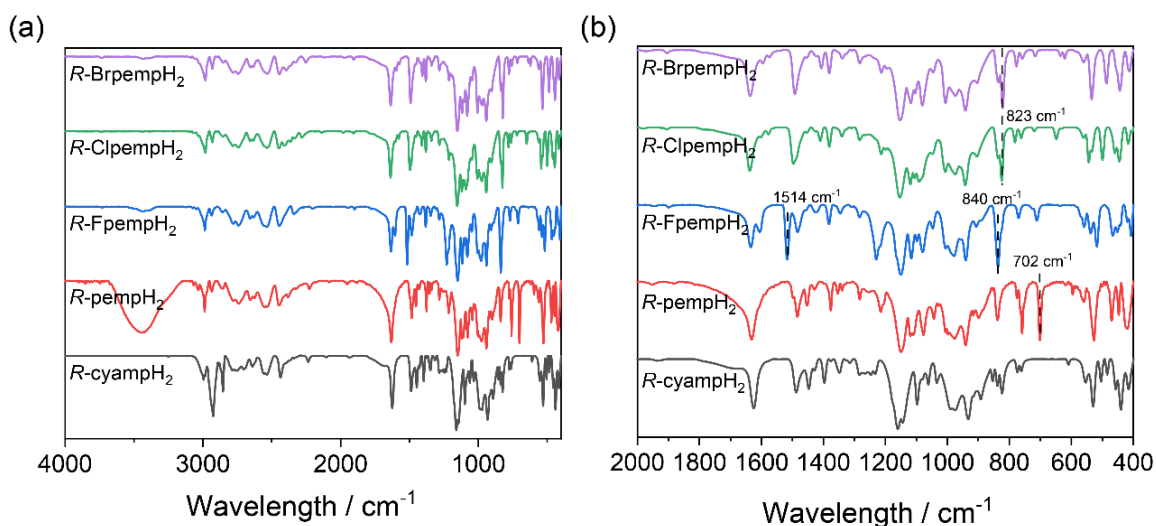

**Figure S4** IR spectra (4000–400 cm<sup>-1</sup> (a) and 2000–400 cm<sup>-1</sup> (b)) of the ligands *R*-cyampH<sub>2</sub>, *R*-pempH<sub>2</sub>, *R*-FpempH<sub>2</sub>, *R*-ClpempH<sub>2</sub>, and *R*-BrpempH<sub>2</sub>, which are used in the syntheses of superhelices ***R*-1H-*x***, ***R*-2F-*x***, ***R*-3Cl-*x***, and ***R*-4Br-*x***.

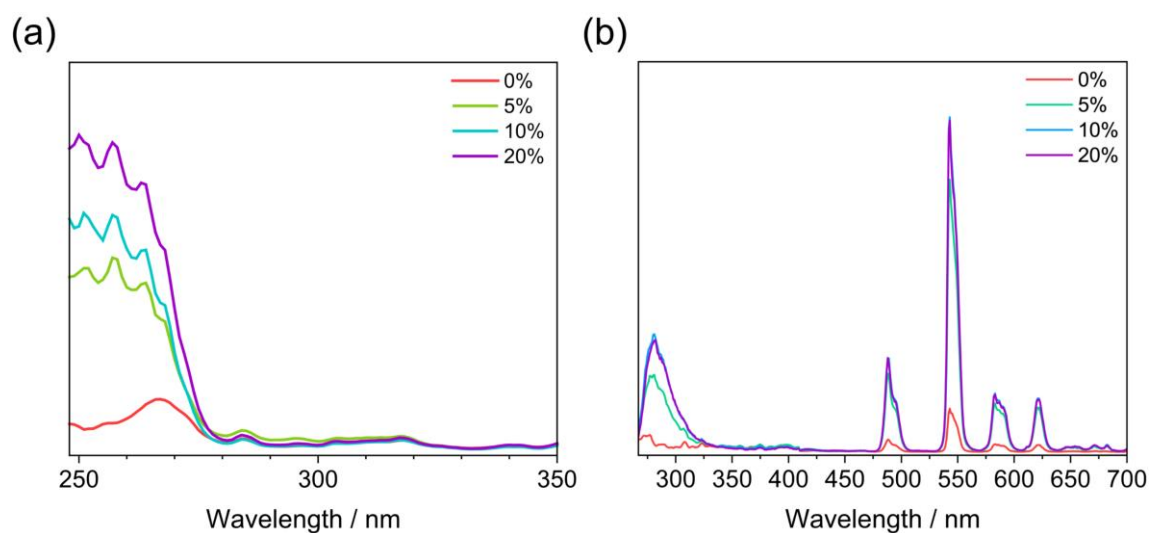

**Figure S5** (a) Excitation spectra (with emission at 543 nm) and (b) emission spectra excited at 247 nm of ***R*-1H-*x*** (*x* = 0%, 5%, 10%, 20%) obtained at pH = 5.0.

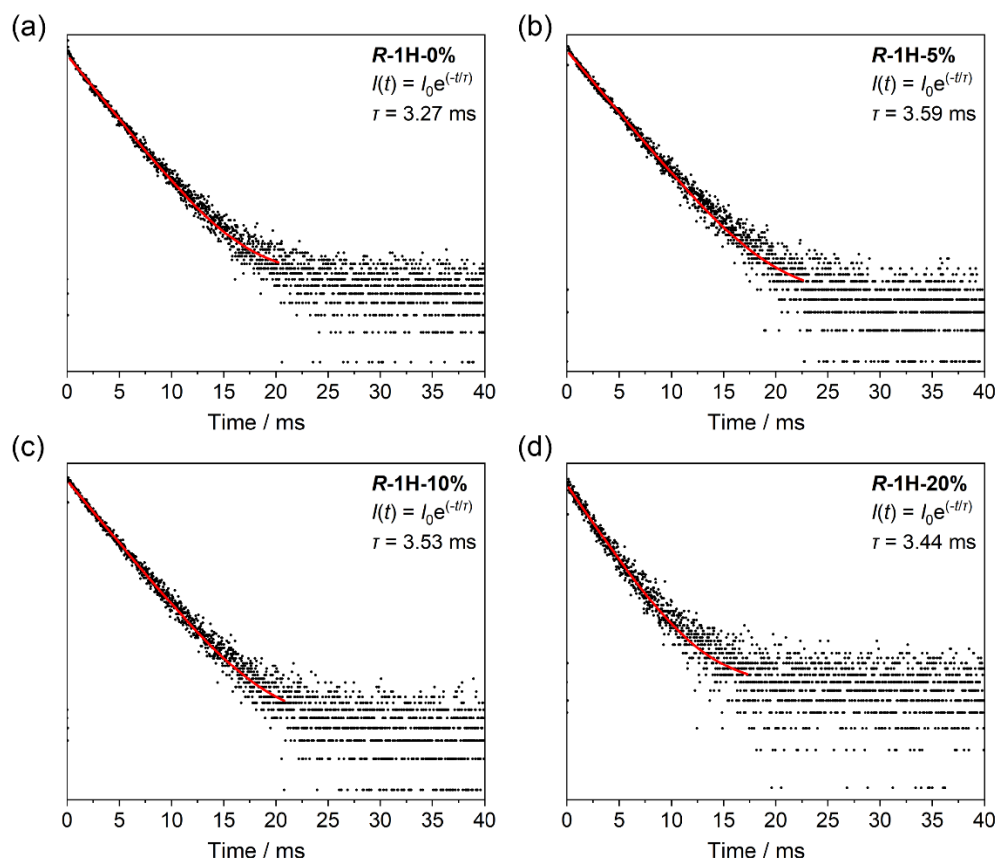

Figure S6 Transient emission decay spectra of **R-1H-x** ( $x = 0\%$ ,  $5\%$ ,  $10\%$ ,  $20\%$ ).

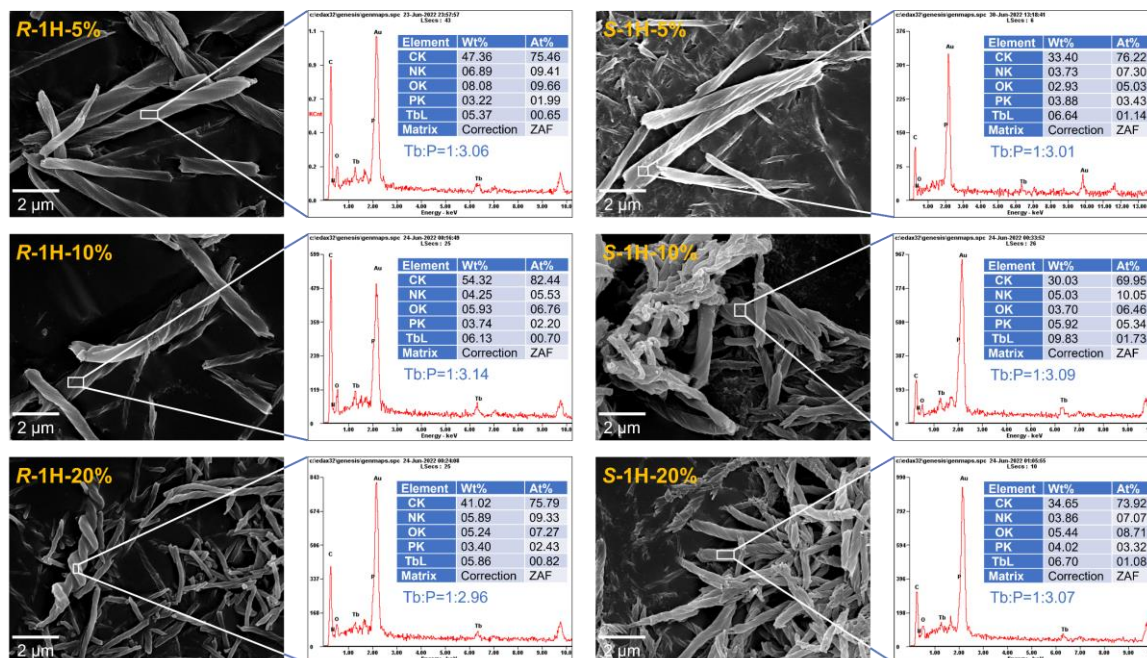

Figure S7 EDX spectra of **R- and S-1H-x** ( $x = 5\%$ ,  $10\%$ ,  $20\%$ ) superhelices.



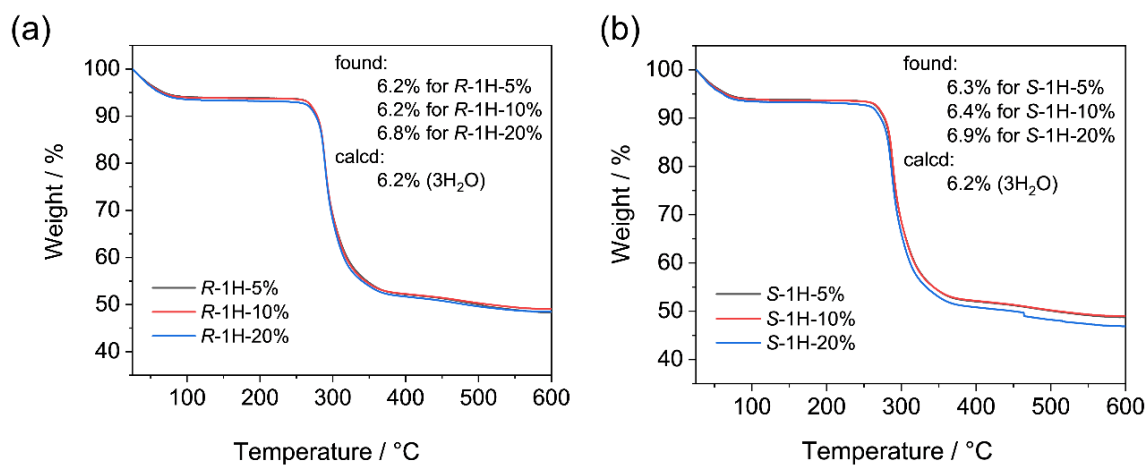

**Figure S8** TG analyses of *R*- and *S*-1H-*x* (*x* = 5%, 10%, 20%) obtained at pH = 5.0.

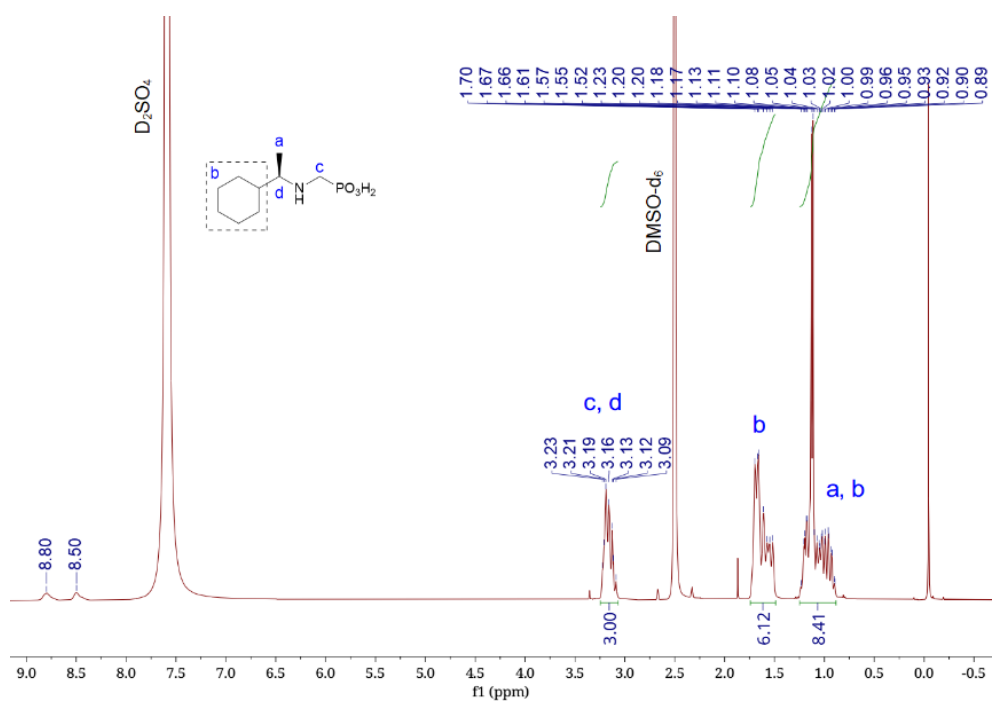

**Figure S9** <sup>1</sup>H-NMR spectra of *R*-1H-0% obtained at pH = 5.0. The peaks at 8.5 and 8.8 ppm are attributed to the H atoms adjacent to N and O atoms of the ligand.

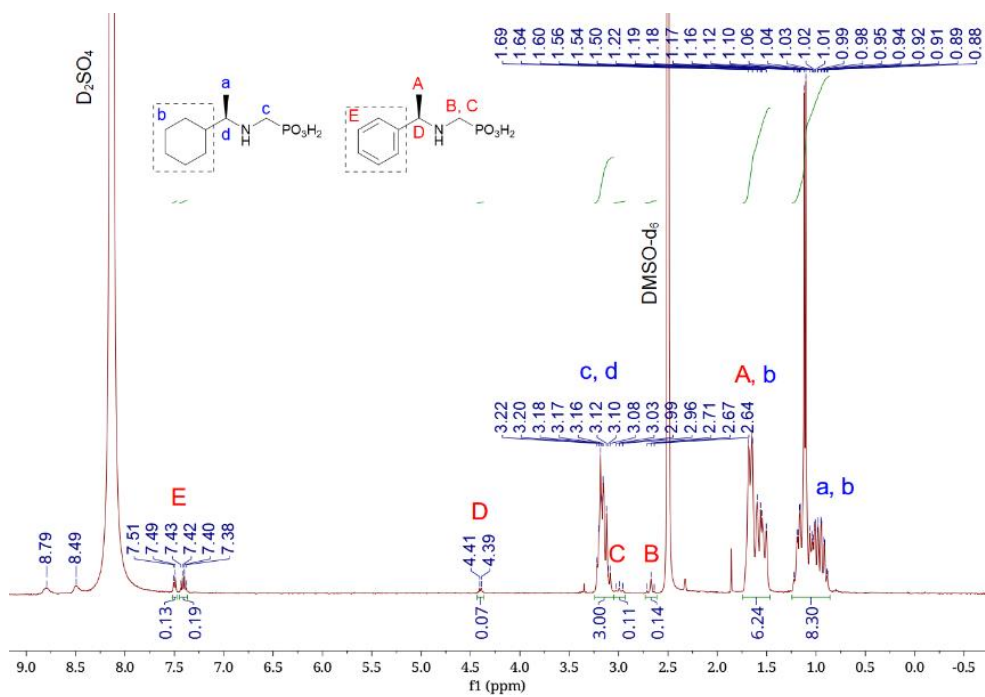

**Figure S10** 1H-NMR spectra of **R-1H-5%** obtained at pH = 5.0.

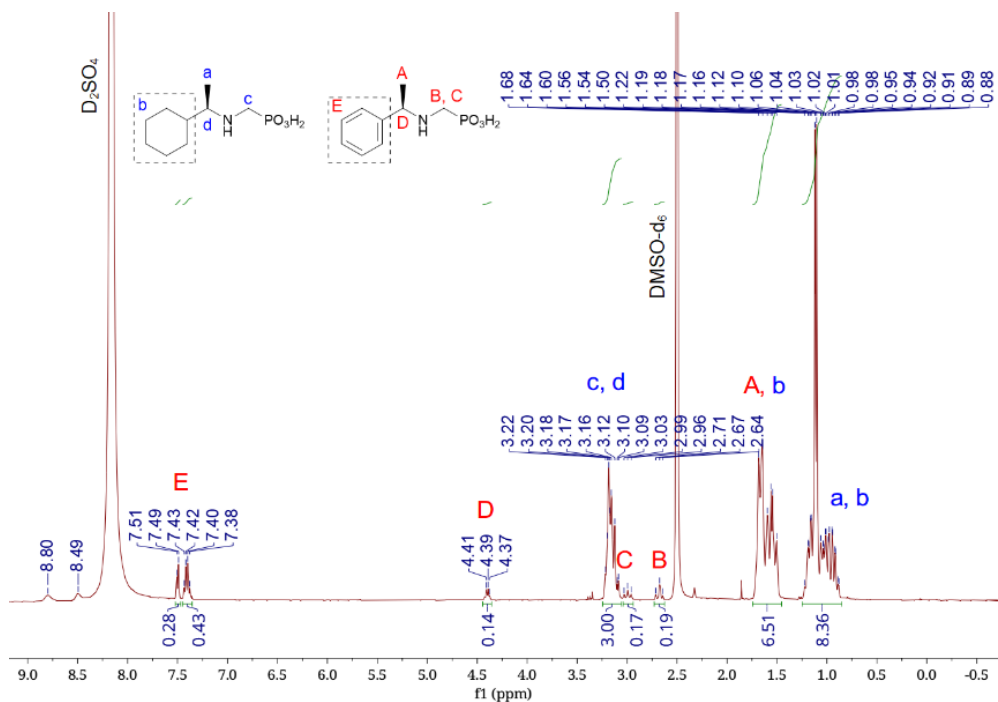

**Figure S11** 1H-NMR spectra of **R-1H-10%** obtained at pH = 5.0.

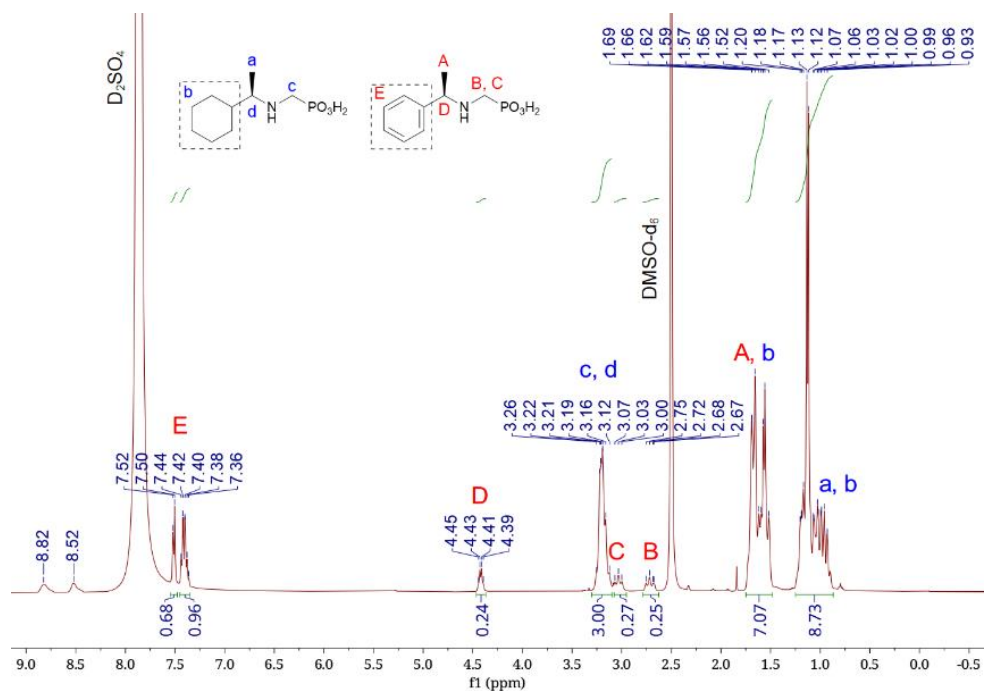

**Figure S12**  $^1\text{H-NMR}$  spectra of **R-1H-20%** obtained at pH = 5.0.

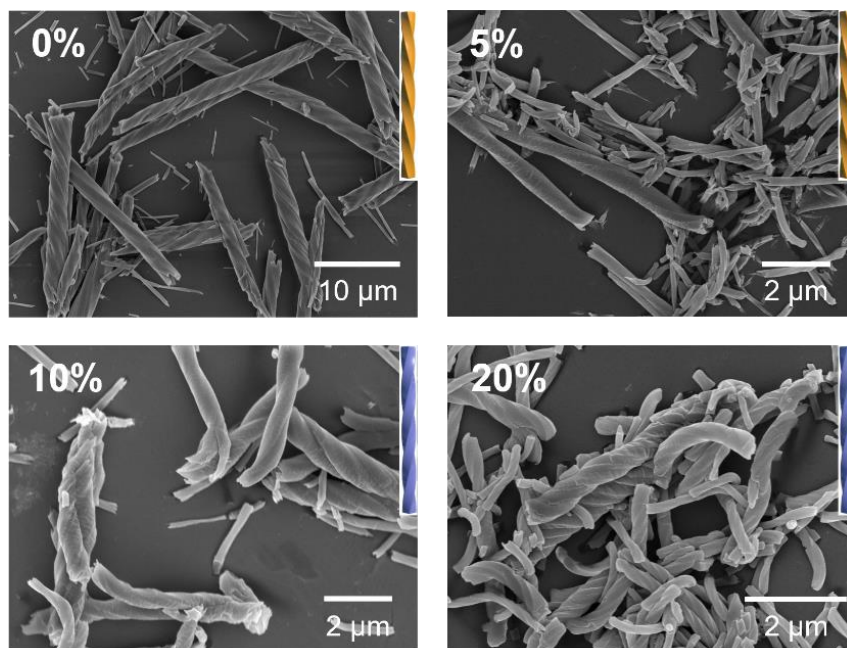

**Figure S13** SEM images of **S-1H-x** (x = 0%, 5%, 10%, and 20%) obtained at pH 5.0.

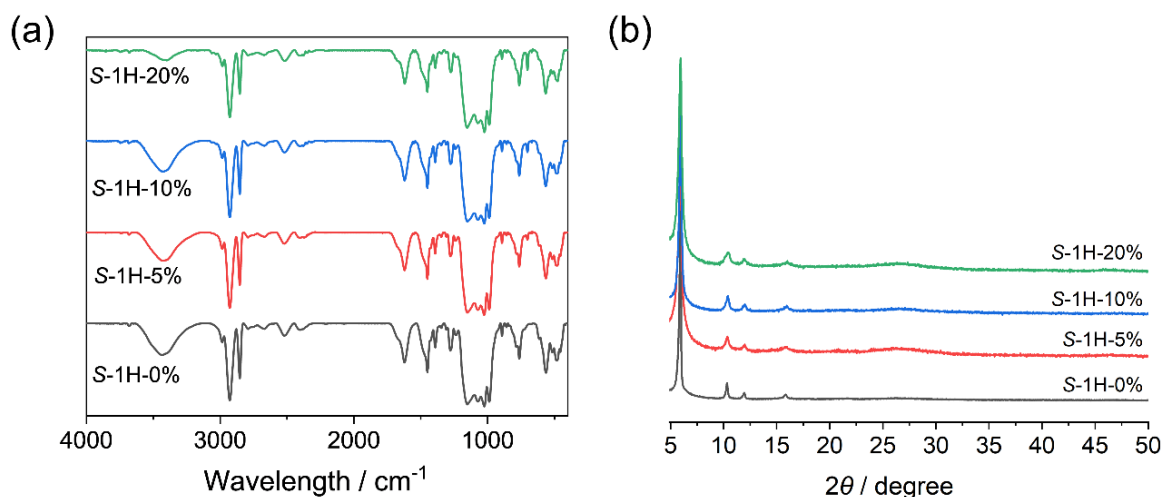

**Figure S14** IR spectra (4000–400  $\text{cm}^{-1}$ ) (a) and PXRD patterns (b) of **S-1H-x** ( $x = 0\%$ ,  $5\%$ ,  $10\%$ ,  $20\%$ ) obtained under pH 5.0.

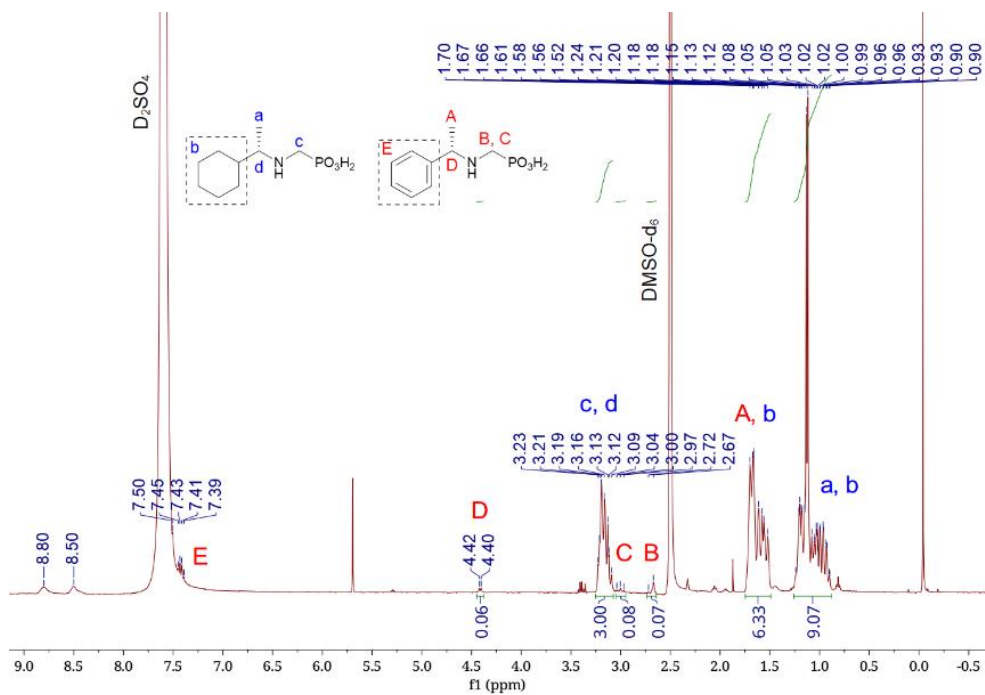

**Figure S15**  $^1\text{H-NMR}$  spectra of **S-1H-5%** obtained at pH = 5.0.

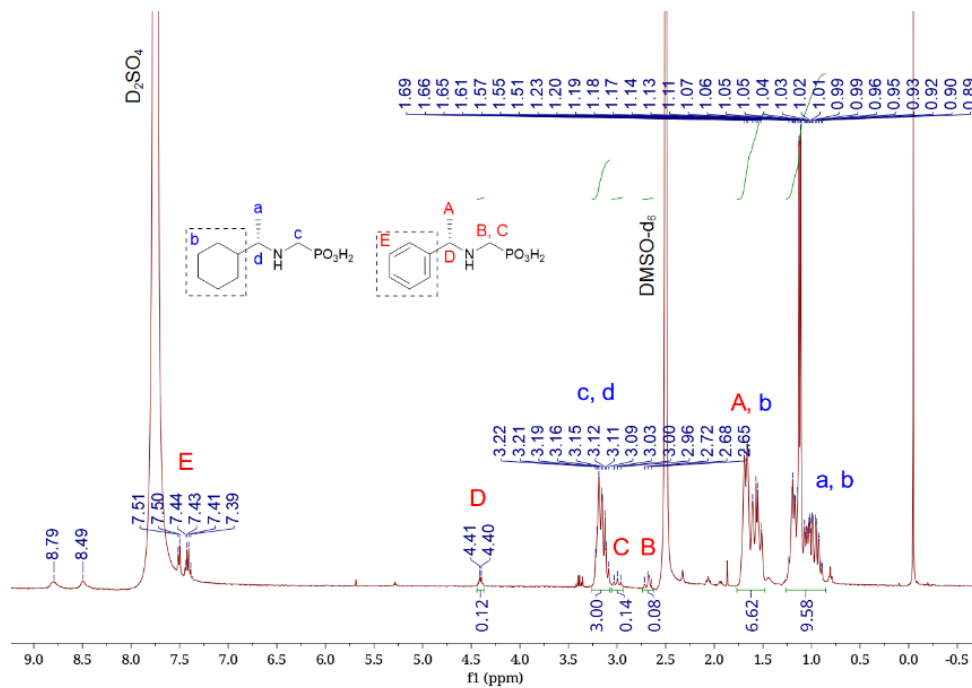

Figure S16 <sup>1</sup>H-NMR spectra of **S-1H-10%** obtained at pH = 5.0.

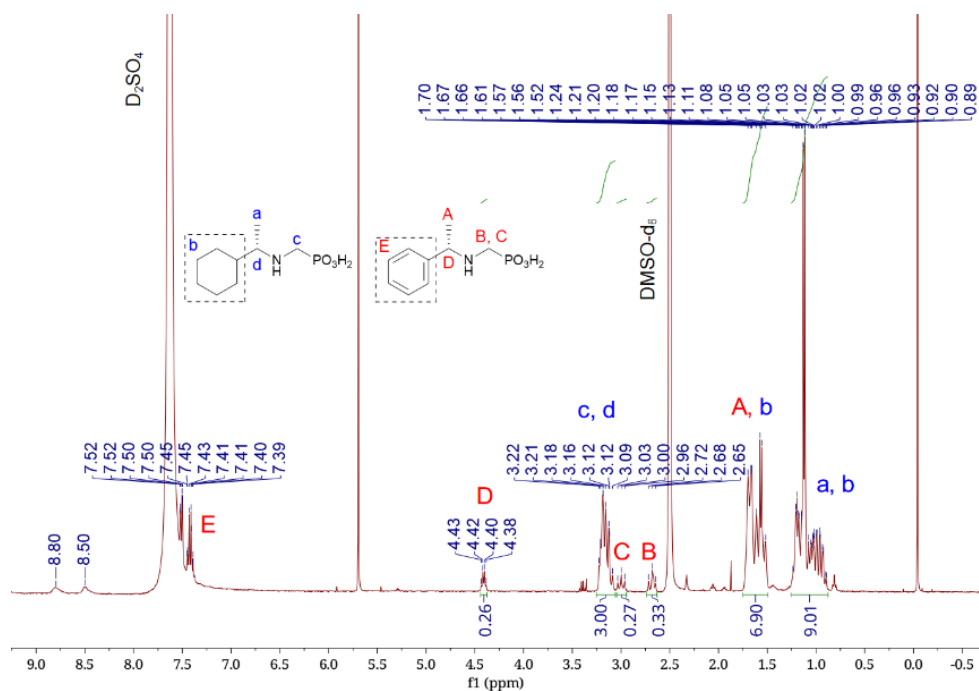

Figure S17 <sup>1</sup>H-NMR spectra of **S-1H-20%** obtained at pH = 5.0.

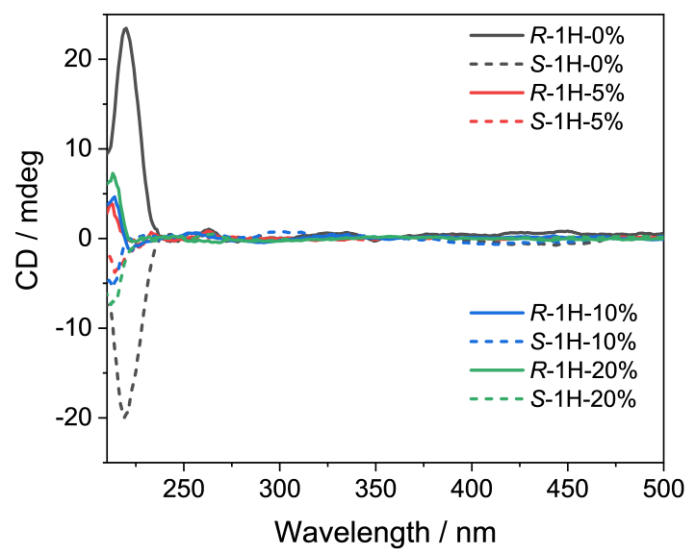

**Figure S18** The ECD spectra of **R**- and **S-1H-x** ( $x = 0\%$ ,  $5\%$ ,  $10\%$ , and  $20\%$ ) obtained under pH 5.0.

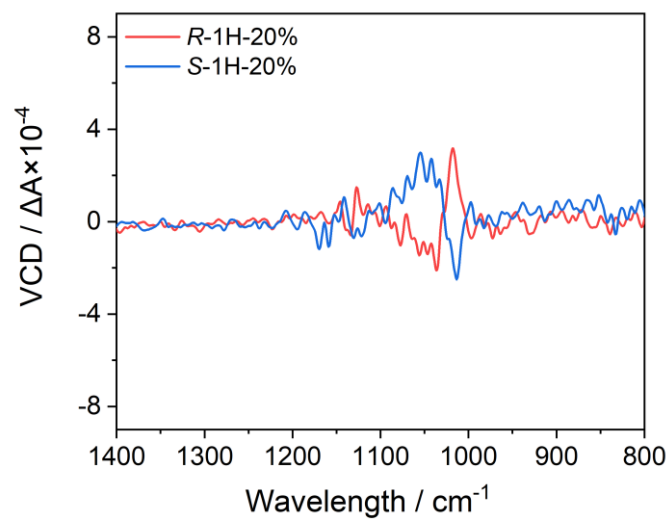

**Figure S19** The VCD spectra of **R**- and **S-1H-20%** obtained under pH 5.0.

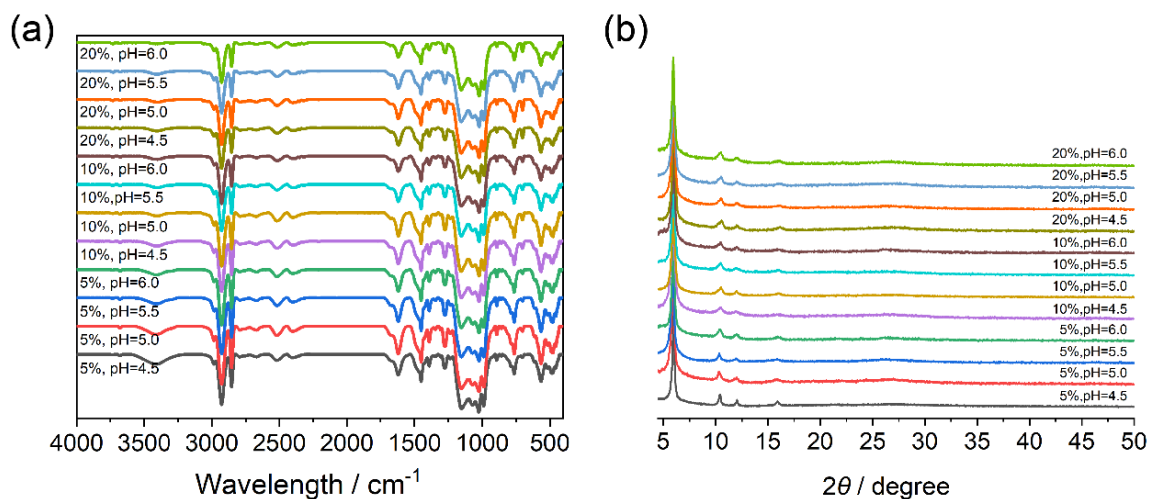

**Figure S20** IR spectra (4000–400  $\text{cm}^{-1}$ ) (a) and PXRD patterns (b) of  $R-1H-x$  ( $x = 5\%$ ,  $10\%$ ,  $20\%$ ) obtained under  $100^\circ\text{C}$  and different pH.

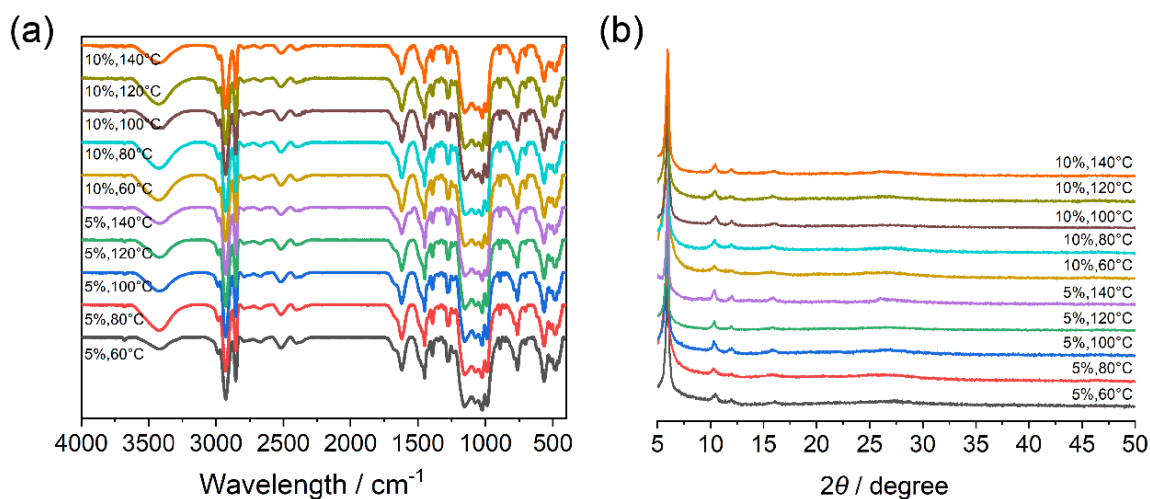

**Figure S21** IR spectra (4000–400  $\text{cm}^{-1}$ ) (a) and PXRD patterns (b) of  $R-1H-x$  ( $x = 5\%$ ,  $10\%$ ) obtained under pH 5.0 and different temperatures.

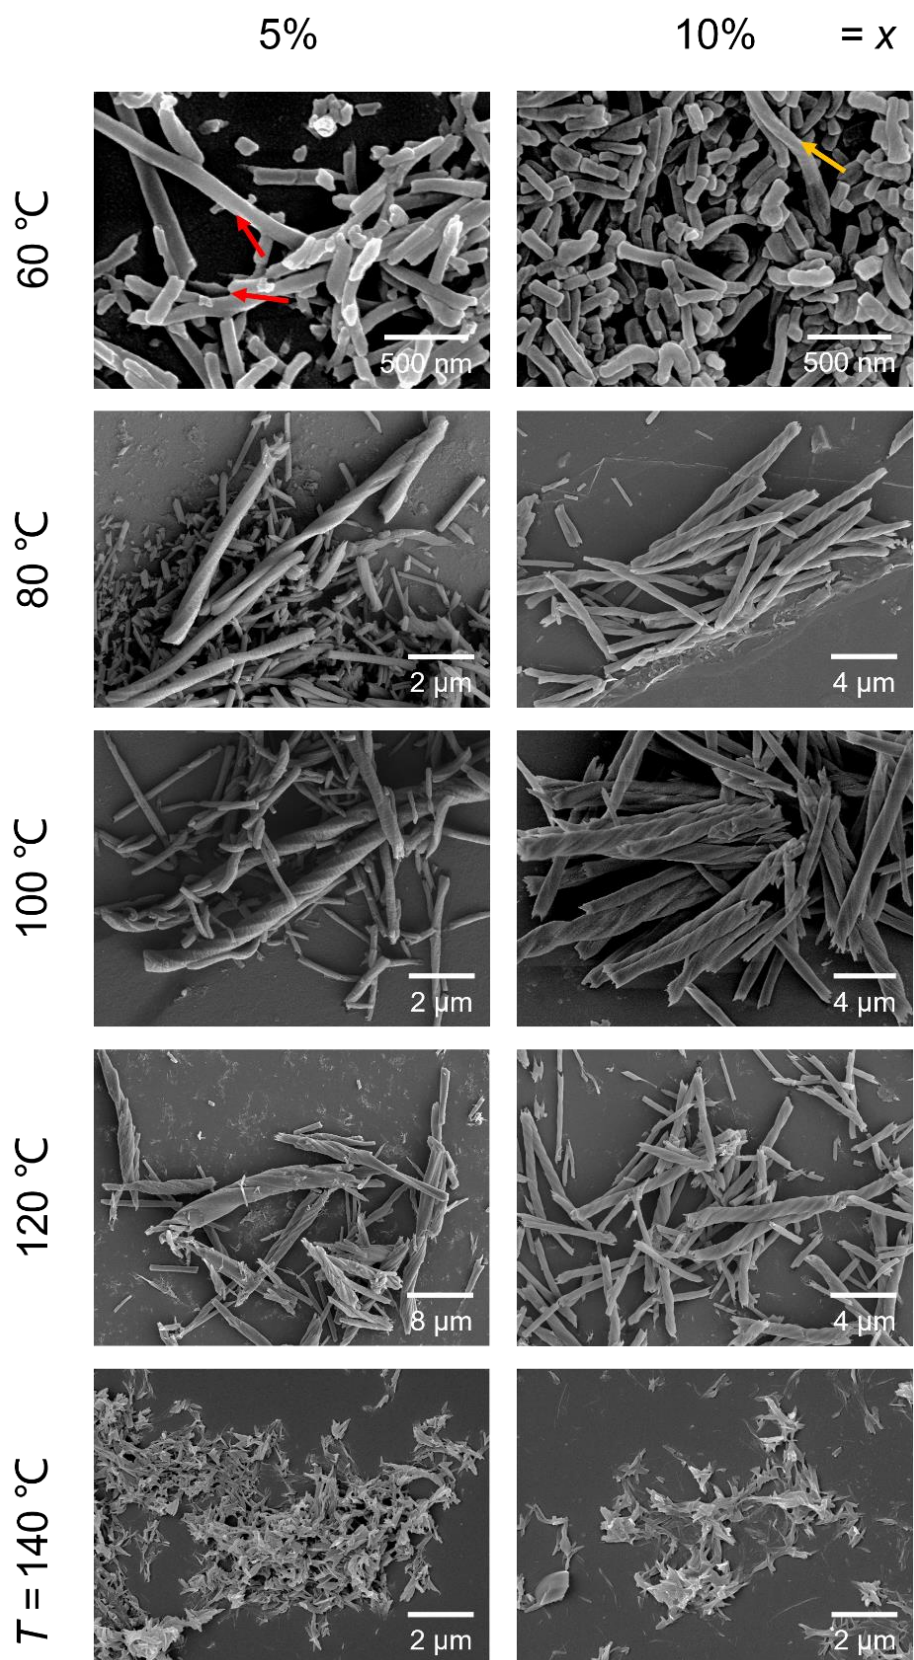

**Figure S22** SEM images of **R-1H-x** ( $x = 5\%$  and  $10\%$ ) obtained at pH 5.0 under hydrothermal reaction in different temperatures  $T$  (from 60 °C to 140 °C).



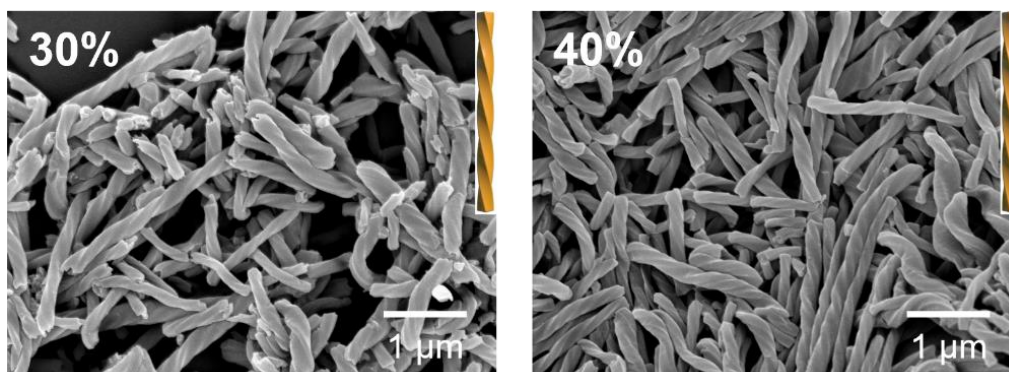

Figure S23 SEM images of *R-1H-x* ( $x = 30\%$  and  $40\%$ ) obtained at pH 5.0.

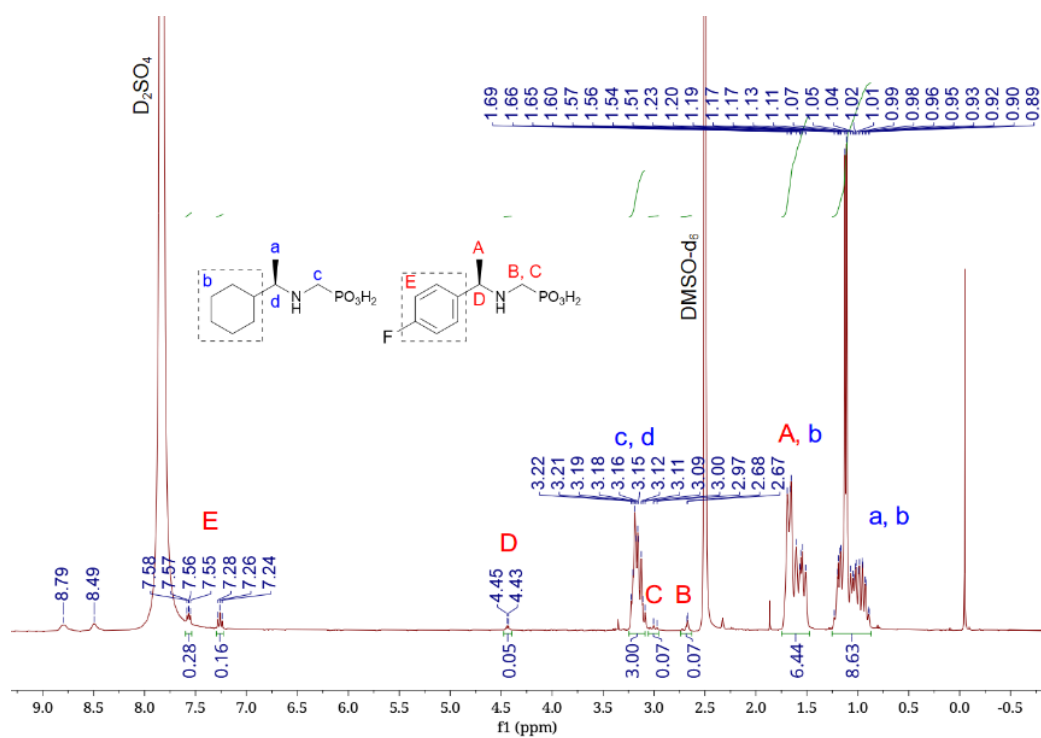

Figure S24 <sup>1</sup>H-NMR spectra of *R-2F-5%* obtained at pH = 5.0.

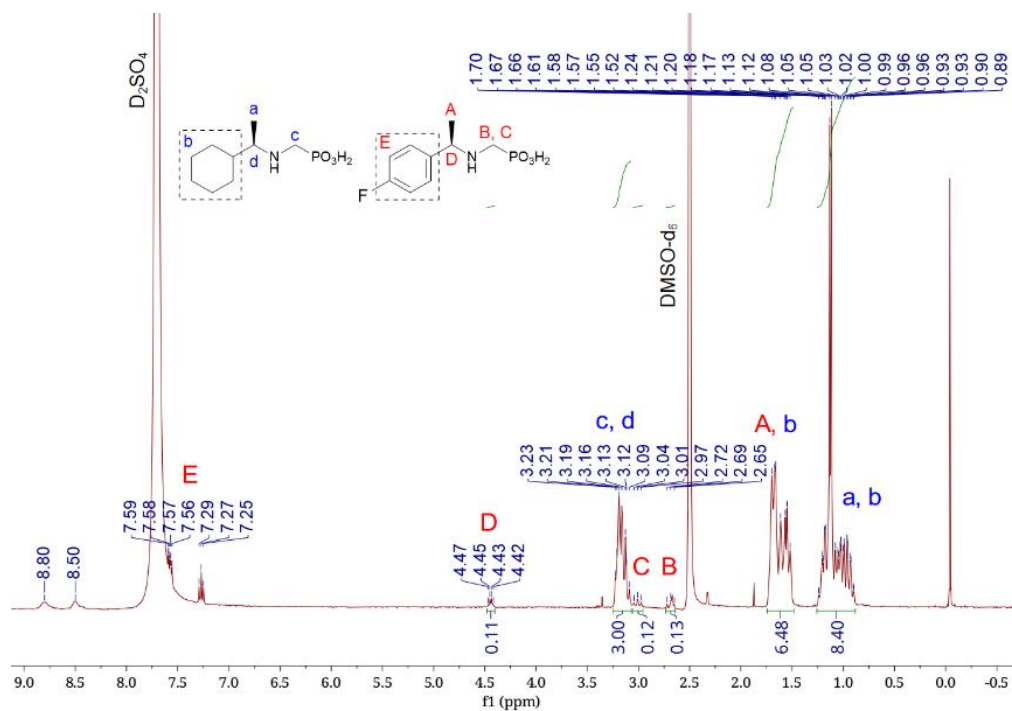

Figure S25 <sup>1</sup>H-NMR spectra of *R*-2F-10% obtained at pH = 5.0.

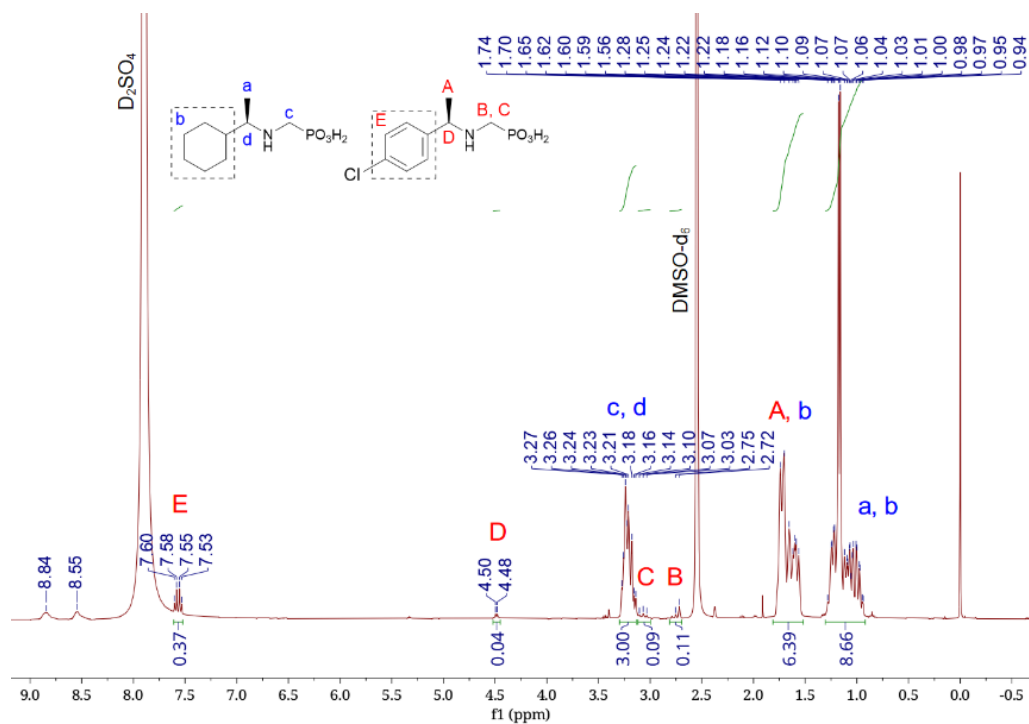

Figure S26 <sup>1</sup>H-NMR spectra of *R*-3Cl-5% obtained at pH = 5.0.

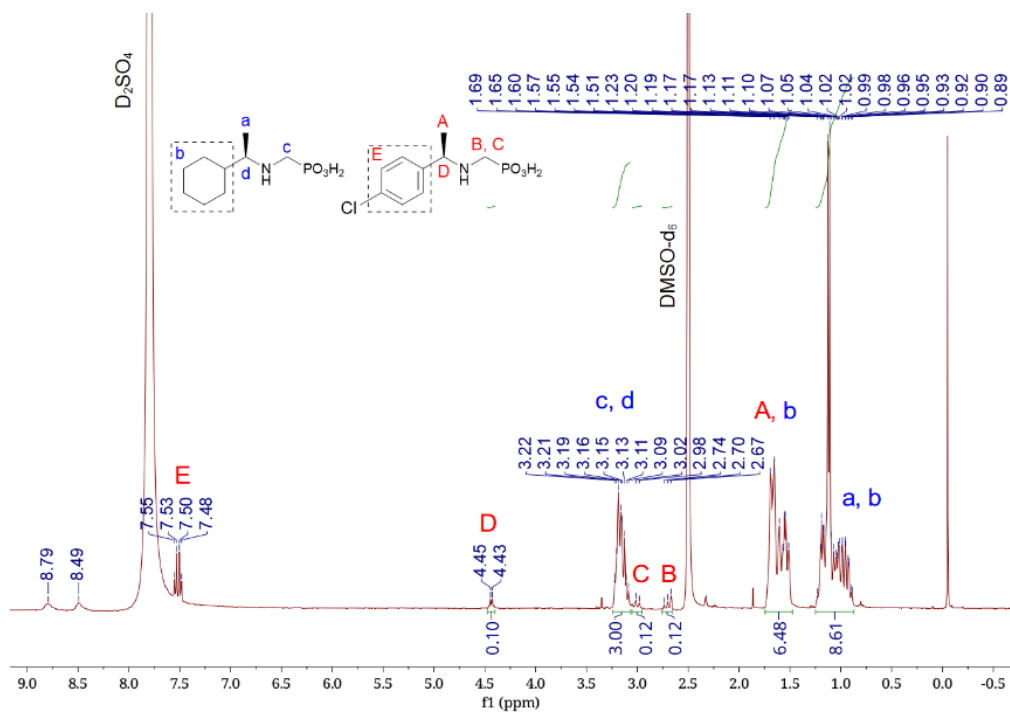

Figure S27 <sup>1</sup>H-NMR spectra of *R*-3Cl-10% obtained at pH = 5.0.

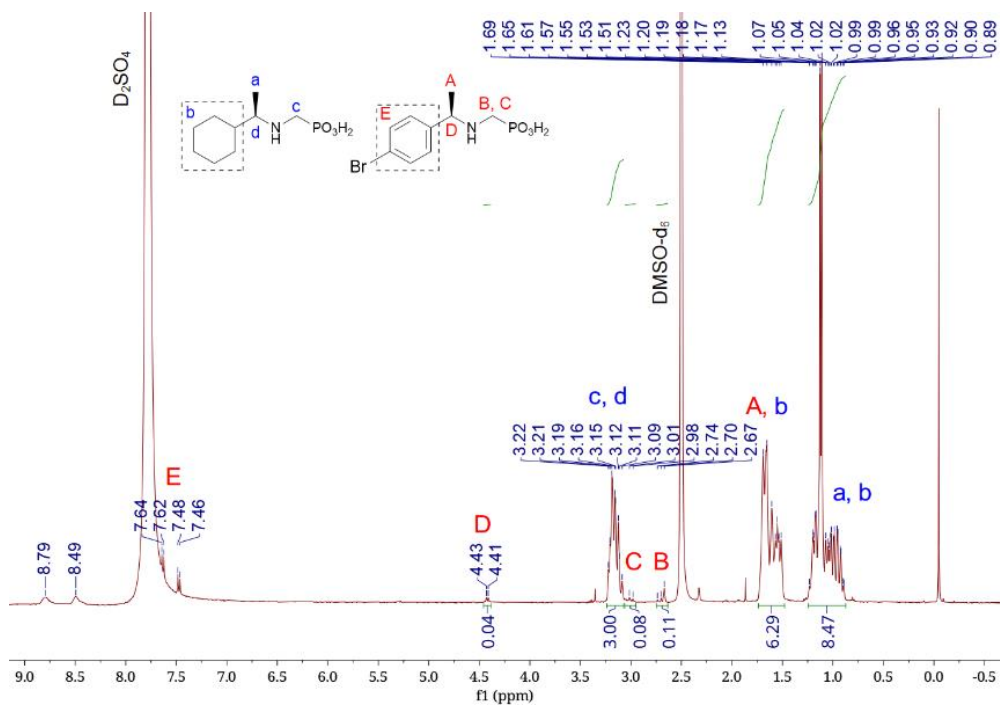

Figure S28 <sup>1</sup>H-NMR spectra of *R*-4Br-5% obtained at pH = 5.0.

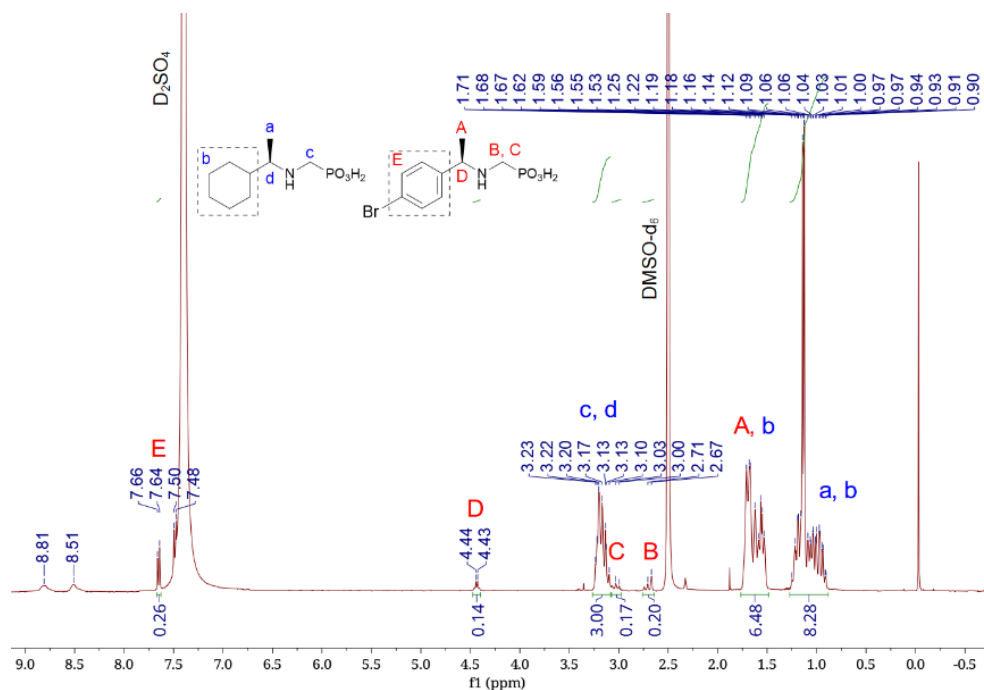

Figure S29  $^1\text{H-NMR}$  spectra of **R-4Br-10%** obtained at pH = 5.0.

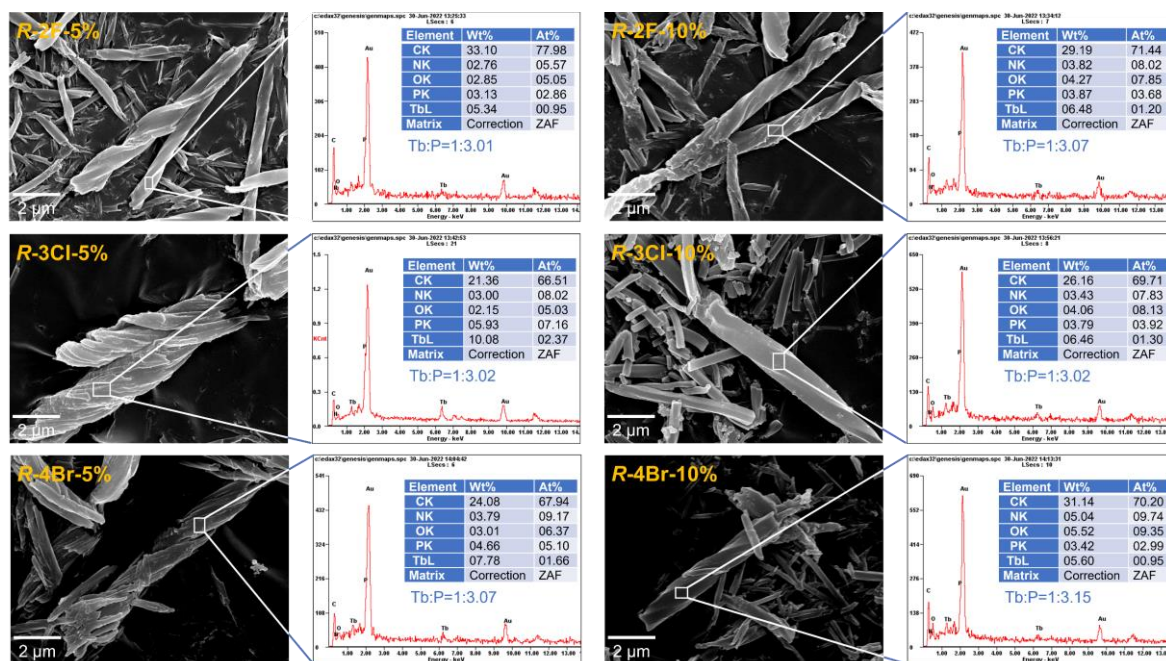

Figure S30 EDX spectra of **R-2F-x**, **R-3Cl-x** and **R-4Br-x** ( $x = 5\%$ ,  $10\%$ ) superhelices.

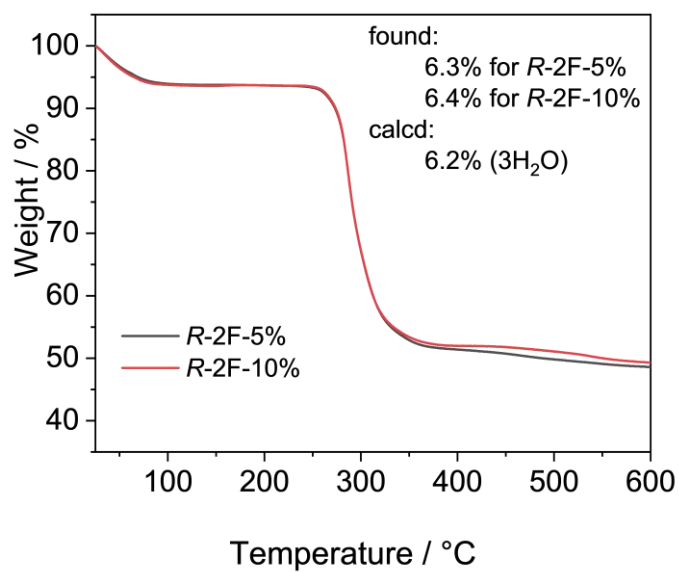

**Figure S31** TG analyses of *R*-2F-*x* (*x* = 5%, 10%) obtained at pH = 5.0.

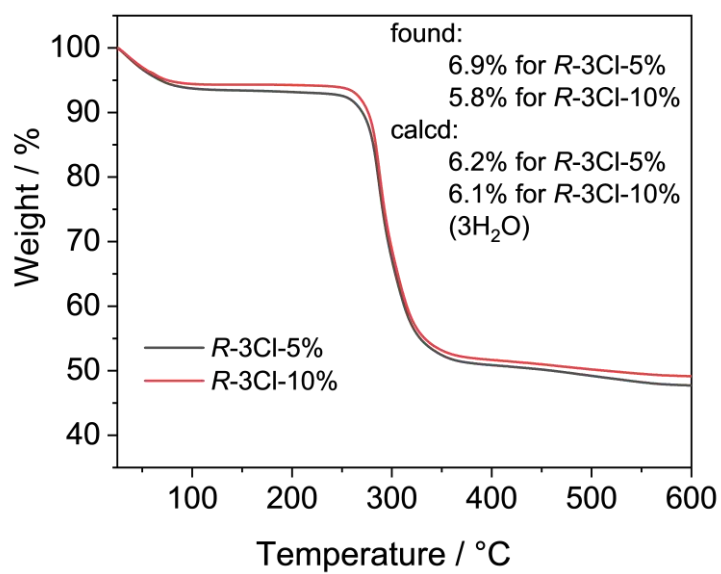

**Figure S32** TG analyses of *R*-3Cl-*x* (*x* = 5%, 10%) obtained at pH = 5.0.

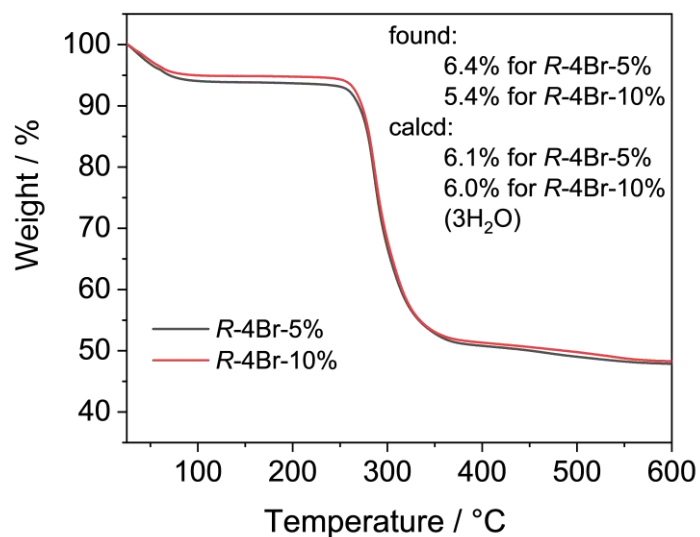

**Figure S33** TG analyses of *R*-4Br-*x* (*x* = 5%, 10%) obtained at pH = 5.0.

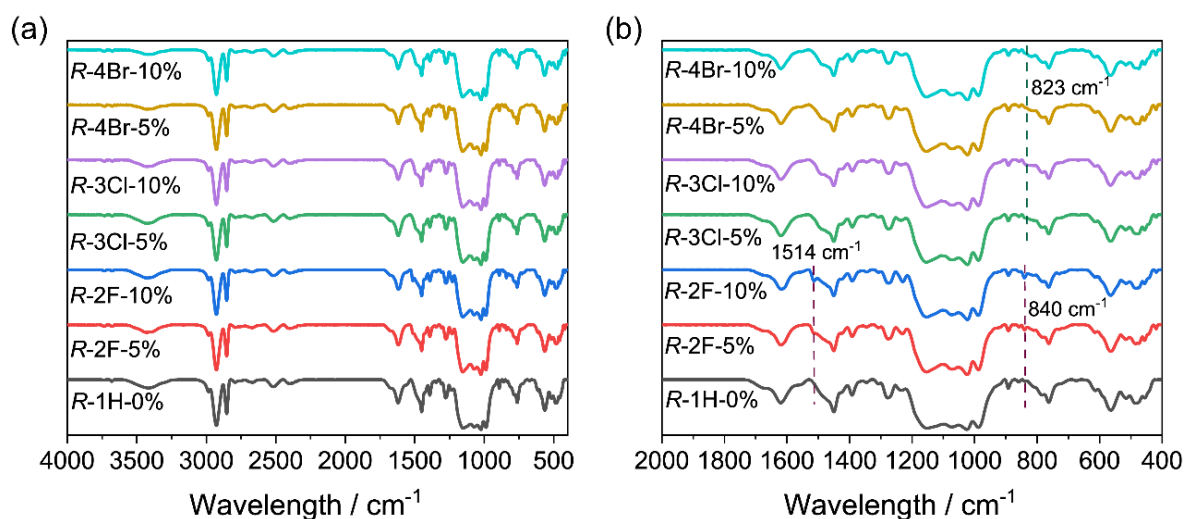

**Figure S34** IR spectra (4000–400 cm<sup>-1</sup> (a) and 2000–400 cm<sup>-1</sup> (b)) of *R*-2F-*x*, *R*-3Cl-*x*, and *R*-4Br-*x* (*x* = 5%, 10%) obtained under pH 5.0. The marked peak positions are the IR signal peaks of the doped ligands X-pempH<sub>2</sub>, which are indicated in Figure S4.

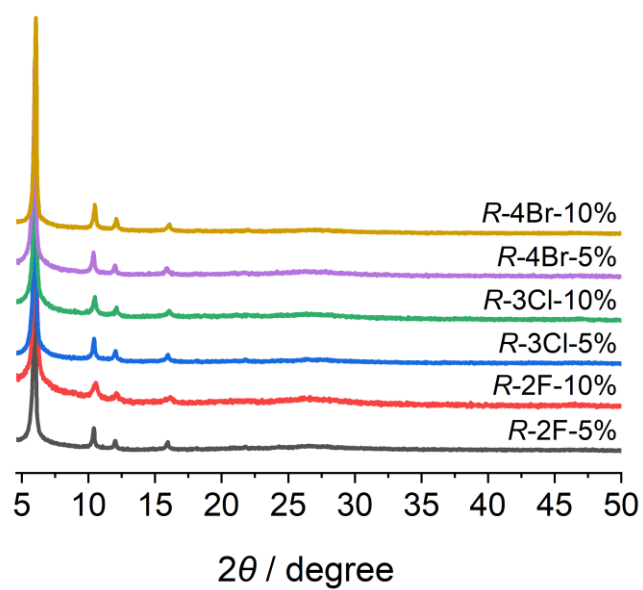

**Figure S35** PXRD patterns of  $R-2F-x$ ,  $R-3Cl-x$ , and  $R-4Br-x$  ( $x = 5\%$ ,  $10\%$ ) obtained under pH 5.0.
